# Supplementary material
Source: Copernicus journal article supplement (doi:10.5194/egusphere-2026-1775)
Supplement: Supplementary file 1 [file egusphere-2026-1775-supplement.pdf]

*Supplement of*

## **Characterization of Dust Aerosol Source Types and Associated Shortwave Direct Radiative Effects Over Cyprus: A Seven-Year Study**

Georgia Charalampous<sup>1,2</sup>, Konstantinos Fragkos<sup>3</sup>, Ilias Fountoulakis<sup>4</sup>, Kyriakoula Papachristopoulou<sup>5</sup>, Anna Moustaka<sup>5</sup>, Franco Marengo<sup>3</sup>, Yevgeny Derimian<sup>6</sup>, Argyro Nisantzi<sup>1,2</sup>, Rodanthi-Elisavet Mamouri<sup>1,2</sup>, Diofantos Hadjimitsis<sup>2,1</sup>, and Stelios Kazadzis<sup>5</sup>

<sup>1</sup>Department of Resilient Society /Department of Environment and Climate Eratosthenes Centre of Excellence, Fragklinou Rousvelt 82, 3012 Limassol, Cyprus

<sup>2</sup>Department of Civil Engineering & Geomatics, Cyprus University of Technology, 3036 Limassol, Cyprus

<sup>3</sup>Climate and Atmosphere Research Centre (CARE-C), The Cyprus Institute, Nicosia, 2121, Cyprus

<sup>4</sup>Research Centre for Atmospheric Physics and Climatology, Academy of Athens, 106 79 Athens, Greece

<sup>5</sup>Physikalisch-Meteorologisches Observatorium Davos, World Radiation Center (PMOD/WRC), Davos 7260, Switzerland

<sup>6</sup>Univ. Lille, CNRS, UMR 8518 - LOA - Laboratoire d'Optique Atmosphérique, F-59000 Lille, France

*Correspondence to:* Georgia Charalampous ([georgia.charalambous@eratosthenes.org.cy](mailto:georgia.charalambous@eratosthenes.org.cy))

**S1 Additional figure**

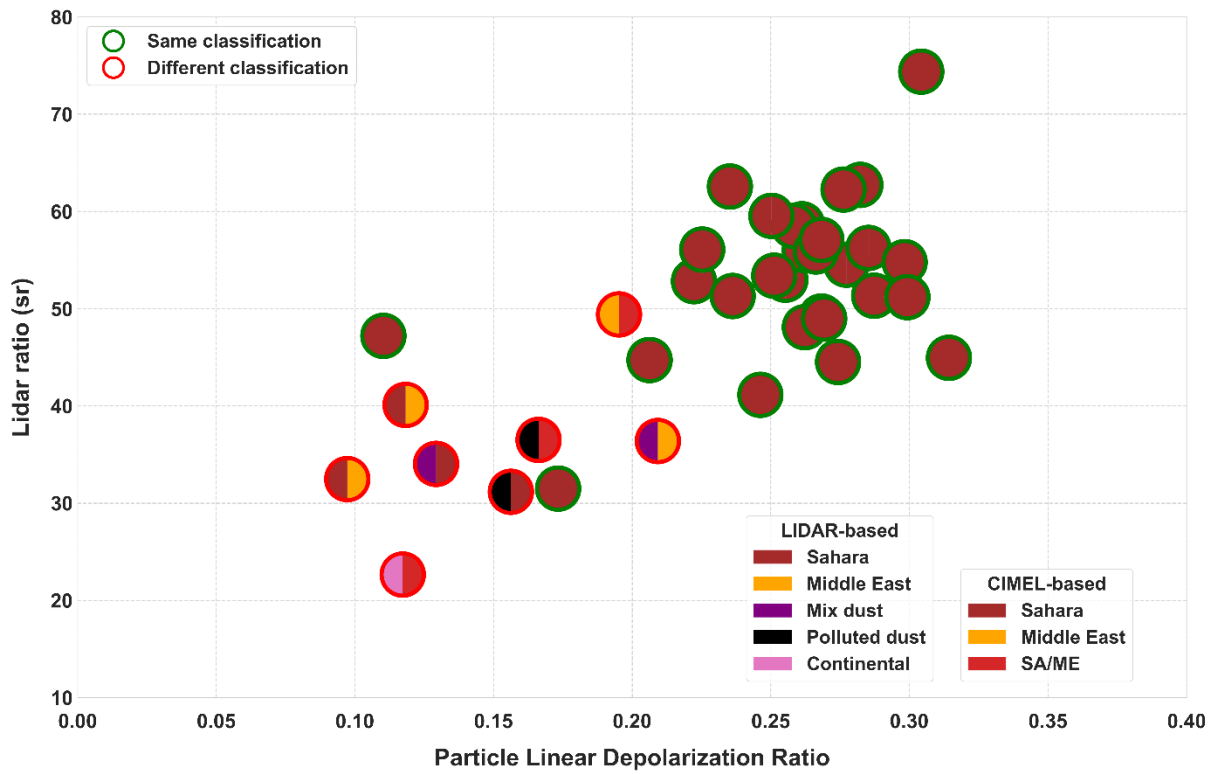

**Figure S1.** Detailed comparison between LIDAR Depolarization (LD)-based aerosol classification and AERONET-Dubovik (AD)-based dust origin classification for all coincident cases at the Agia Marina Xyliatou (AMX) station. Each point represents a coincident daily observation under cloud-free conditions and is shown in particle linear depolarization ratio–lidar ratio space. Pie markers are used to simultaneously represent both classification approaches: the left half corresponds to the LD-based aerosol type (Dust, Dust mixtures, Polluted dust, and Continental), while the right half corresponds to the AD-based dust origin classification (Sahara, Middle East, or mixed SA/ME from HYSPLIT trajectories). Marker edge color indicates agreement (green) or disagreement (red) between the two methods.
